# Supplementary material
Source: Springer Nature journal article supplement (https://www.springermedizin.de/resource/supplementary/13012_2010_456_MOESM2_ESM.pdf/9629724)

National policies, rules & guidelines

District level institutional contexts

Relationships with intervention  
implementers

CHMT's motivation, interests

A4R conditions (mechanisms) →

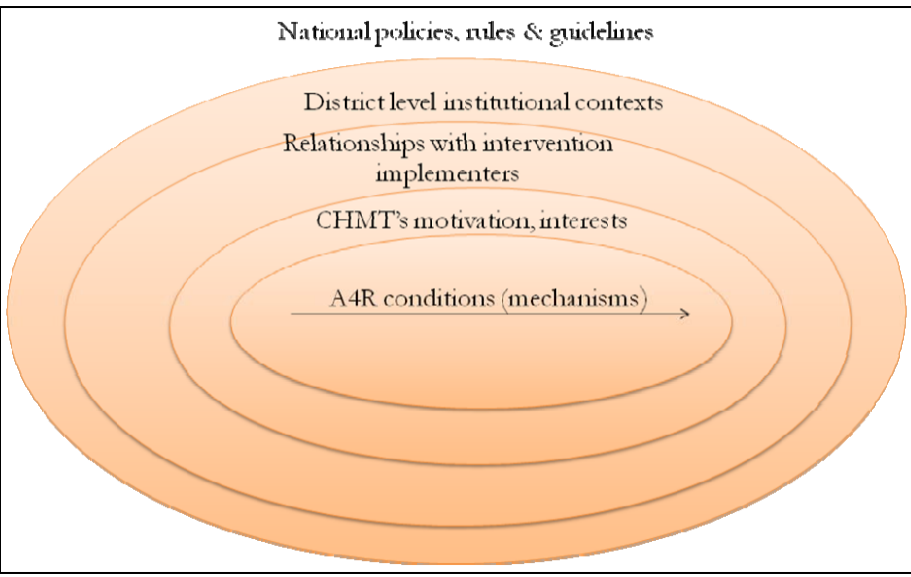

Supplement: MOESM2 [file 9629724]
